# Supplementary material for: Characterisation of the immune repertoire of a humanised transgenic mouse through immunophenotyping and high-throughput sequencing
Source: eLife. 2023 Mar 27;12:e81629. doi: 10.7554/eLife.81629 (PMC10115447; doi:10.7554/eLife.81629)
Supplement: Supplementary file 1. — Supplementary File 1a: Dominant canonical forms per IGHV subgroup. Predicting the canonical form based solely on the dominant form observed for the IGHV subgroup would result in accuracy between 46.2% and 100%. Differences can be seen between the Kymouse and human in IGHV1, in which the majority of human sequences are H1-8-A vs. H1-8-C in the Kymouse. Supplementary File 1b: Information about the number of CDRH3 structural clusters produced with different thresholds under the select greedy clustering algorithm. 0.6 Å was the threshold selected by Kovaltsuk et al., 2020, in the original SAAB+ application. [file elife-81629-supp1.xlsx]

## Sheet: Sheet1
Species	IGHV subgroup	Dominant H1 canonical form	Dominant H2 canonical form	% in dominant H1 canonical form	% in dominant H2 canonical form
Human	IGHV1	H1-8-A	H2-8-A	60.5	100
Human	IGHV2	H1-10-A	H2-7-A	100	100
Human	IGHV3	H1-8-A	H2-8-B	100	86.7
Human	IGHV4	H1-8-A	H2-7-A	63.7	100
Human	IGHV5	H1-8-C	H2-8-A	100	100
Human	IGHV6	H1-10-B	None	100	100
Human	IGHV7	H1-8-C	H2-8-A	99.9	100
Kymouse	IGHV1	H1-8-C	H2-8-A	66.3	100
Kymouse	IGHV2	H1-10-A	H2-7-A	100	100
Kymouse	IGHV3	H1-8-A	H2-8-B	100	78.9
Kymouse	IGHV4	H1-8-A	H2-7-A	46.2	100
Kymouse	IGHV5	H1-8-C	H2-8-A	66.3	100
Kymouse	IGHV6	H1-10-B	None	100	100
Kymouse	IGHV7	H1-8-C	H2-8-A	100	100
Mouse	IGHV1	H1-8-A	H2-8-A	49.9	96.7
Mouse	IGHV2	H1-8-A	H2-7-A	99.9	100
Mouse	IGHV3	H1-9-A	H2-7-A	90.2	100
Mouse	IGHV4	H1-8-A	H2-8-B	81.4	100
Mouse	IGHV5	H1-8-A	H2-8-B	98.1	100
Mouse	IGHV6	H1-8-A	H2-10-A	99.9	100
Mouse	IGHV7	H1-8-A	H2-10-A	100	100
Mouse	IGHV8	H1-10-A	H2-7-A	100	94.3
Mouse	IGHV9	H1-8-A	H2-8-A	100	100
